# Supplementary material for: AXL degradation in combination with EGFR-TKI can delay and overcome acquired resistance in human non-small cell lung cancer cells
Source: PubMed Central journal article supplement (PMC6494839; doi:10.1038/s41419-019-1601-6), 2019-05-01
Supplement: 41419_2019_1601_MOESM1_ESM.pdf [file 41419_2019_1601_MOESM1_ESM.pdf]

**A**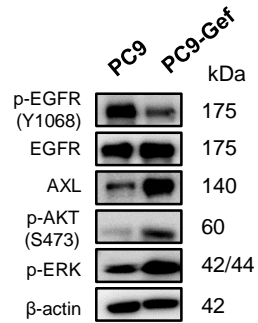**B**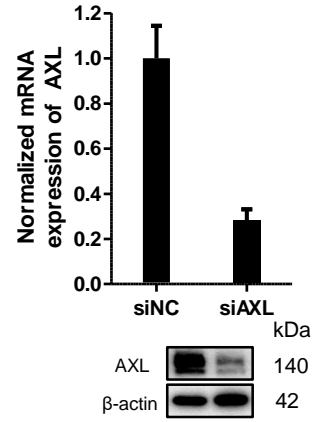**C**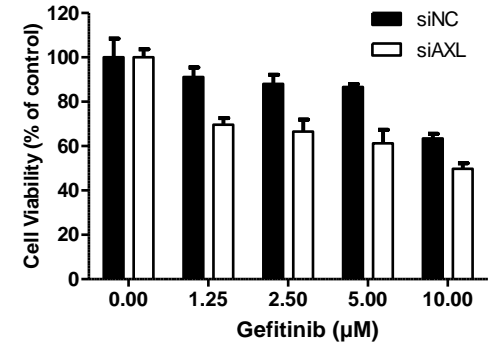**D**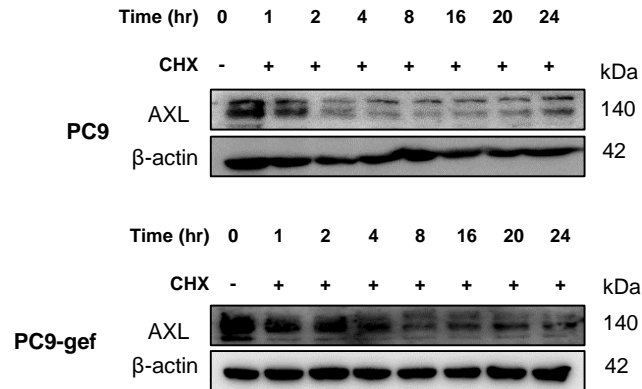

| Cell lines | Half-life of AXL after CHX treatment (hr) |
|------------|-------------------------------------------|
| PC9        | 2.1                                       |
| PC9-gef    | 16.7                                      |

**A**

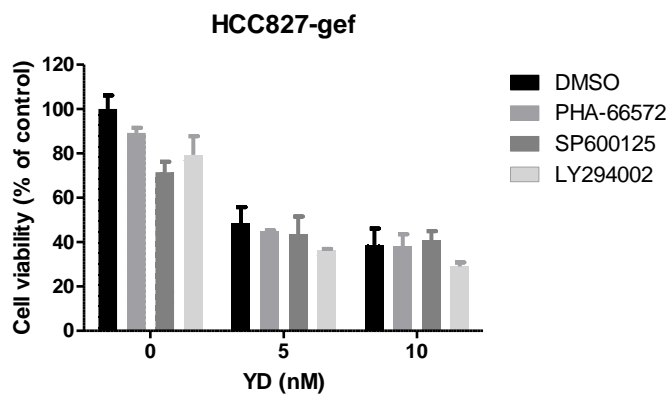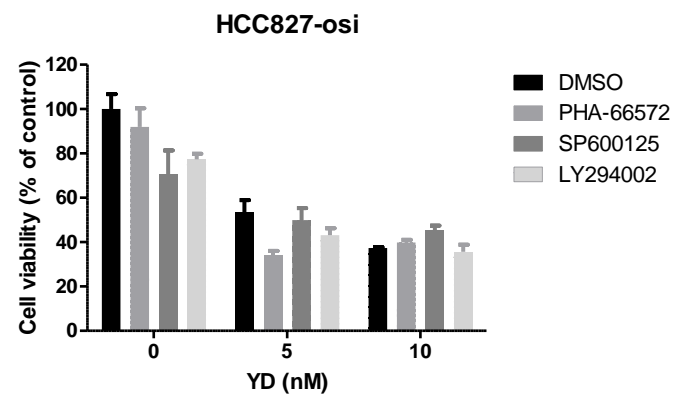

**B**

**HCC827-gef**

| PHA-665752 (μM) | YD 5 nM |                  | YD 10 nM |                  |
|-----------------|---------|------------------|----------|------------------|
|                 | CI      | Description      | CI       | Description      |
| 0.16            | 0.190   | Strong synergism | 0.335    | Synergism        |
| 0.8             | 0.237   | Strong synergism | 0.237    | Strong synergism |
| 4               | 0.594   | Synergism        | 0.548    | Synergism        |
| 20              | 0.195   | Strong synergism | 0.192    | Strong synergism |

| SP600125 (μM) | YD 5 nM |                  | YD 10 nM |                  |
|---------------|---------|------------------|----------|------------------|
|               | CI      | Description      | CI       | Description      |
| 0.16          | 0.355   | Synergism        | 0.355    | Synergism        |
| 0.8           | 0.322   | Synergism        | 0.322    | Synergism        |
| 4             | 0.238   | Strong synergism | 0.238    | Strong synergism |
| 20            | 0.141   | Strong synergism | 0.141    | Strong synergism |

| LY294002 (μM) | YD 5 nM |                  | YD 10 nM |                  |
|---------------|---------|------------------|----------|------------------|
|               | CI      | Description      | CI       | Description      |
| 0.16          | 0.306   | Synergism        | 0.360    | Synergism        |
| 0.8           | 0.209   | Strong synergism | 0.340    | Synergism        |
| 4             | 0.191   | Strong synergism | 0.215    | Strong synergism |
| 20            | 0.214   | Strong synergism | 0.181    | Strong synergism |

**HCC827-osi**

| PHA-665752 (μM) | YD 5 nM |                       | YD 10 nM |                       |
|-----------------|---------|-----------------------|----------|-----------------------|
|                 | CI      | Description           | CI       | Description           |
| 0.16            | 0.140   | Strong synergism      | 0.126    | Synergism             |
| 0.8             | 0.064   | Very strong synergism | 0.060    | Very strong synergism |
| 4               | 0.179   | Strong synergism      | 0.201    | Strong synergism      |
| 20              | 0.044   | Very strong synergism | 0.045    | Very strong synergism |

| SP600125 (μM) | YD 5 nM |                  | YD 10 nM |                  |
|---------------|---------|------------------|----------|------------------|
|               | CI      | Description      | CI       | Description      |
| 0.16          | 0.135   | Synergism        | 0.186    | Strong synergism |
| 0.8           | 0.196   | Synergism        | 0.101    | Synergism        |
| 4             | 0.300   | Strong synergism | 0.304    | Synergism        |
| 20            | 0.737   | Strong synergism | 0.644    | Synergism        |

| LY294002 (μM) | YD 5 nM |                  | YD 10 nM |                  |
|---------------|---------|------------------|----------|------------------|
|               | CI      | Description      | CI       | Description      |
| 0.16          | 0.213   | Synergism        | 0.436    | Synergism        |
| 0.8           | 0.263   | Strong synergism | 0.512    | Synergism        |
| 4             | 0.396   | Strong synergism | 0.342    | Strong synergism |
| 20            | 0.952   | Strong synergism | 0.881    | Strong synergism |

**PHA-665752: c-MET inhibitor**  
**SP600125: JNK inhibitor**  
**LY294002: PI3K inhibitor**
